# Supplementary material
Source: HighWire-hosted journal article supplement (https://bmjopen.bmj.com/content/9/1/e025299)
Supplement: inline-supplementary-material-1 [file inline-supplementary-material-1.pdf]

## **Supplementary file 1: Interview topic guide**

1. Tell me what you understand by informed consent.
2. Do you think it is useful to have an informed consent taking process?  
Probe; Why?
3. Who should participate in the informed consent taking process?  
Probe; what impact family members have in your decision?
4. Who is in charge of consent taking process?  
Probe; is it only the doctor's responsibility?  
Do you think you can disagree with the doctor's decision?
5. What should the informed consent process consist of?  
Probe; who should explain the details to you?  
For how long should this be carried out?  
What setting would be ideal?
6. Are you satisfied with how informed consent was obtained from you?  
Probe; what areas in the consent taking process are you satisfied about?  
What areas in the consent process were lacking?  
What changes will make the consent taking process a success?
