# Supplementary material
Source: HighWire-hosted journal article supplement (https://bmjopen.bmj.com/content/9/1/e025299)
Supplement: inline-supplementary-material-2 [file inline-supplementary-material-2.pdf]

Supplementary file 2: The coding framework

| Patient's Comment                                                                                                                                                                                                                                                                                                                                     | Initial Coding                                                    | Categories                                 | Themes                                   |
|-------------------------------------------------------------------------------------------------------------------------------------------------------------------------------------------------------------------------------------------------------------------------------------------------------------------------------------------------------|-------------------------------------------------------------------|--------------------------------------------|------------------------------------------|
| "I believe I have the right to know what is being done to my body" (interviewee #16, mastectomy)                                                                                                                                                                                                                                                      | Right to information                                              | Legal entity                               | What informed consent meant              |
| "We cannot say no, if we do we will be asked to leave. I travelled so far just for this surgery" (interviewee #6, cholecystectomy)                                                                                                                                                                                                                    | Cannot reject                                                     |                                            |                                          |
| "Signature in consent taking is all about making sure no harm comes to the doctor. Whatever happens during surgery, it is I who has to suffer" (interviewee #7, oesophagectomy)                                                                                                                                                                       | Safeguard the doctor                                              |                                            |                                          |
| "Decision making is a doctor's job. I have no objections to their opinion." (Interviewee #15, bariatric surgery)                                                                                                                                                                                                                                      | Doctors make decisions                                            | Professional governance in decision making |                                          |
| "I don't know about our condition, so we are dependent on the doctor".<br>"I don't know who else to question apart from the doctor allocated to me" (Interviewee #26, pancreatectomy).                                                                                                                                                                | Dependent on the doctor<br>-                                      |                                            |                                          |
| "Most of the information about me was gathered from my bystanders rather than directly questioning me. So, I thought that the bystander was supposed to consent for me" (interviewee #22, thyroidectomy)                                                                                                                                              | Discuss mostly with bystander                                     | Patient's opinion matters                  | Who should be involved in consent taking |
| "It is better if a family member is present when the doctor gives details about the surgery, because we are distressed. So (I) cannot comprehend what's being told" (interviewee #25, cholecystectomy)<br><br>"My family will be affected by my decision, (therefore) it is better if they can also give their ideas" (interviewee #4, thyroidectomy) | Patients are distressed<br><br>Family members aid decision making | Surgeon-patient-family involvement         |                                          |

|                                                                                                                                                                                                                                                                                                                                                                                                                                                                                                                                                                                                                                                                                                                                                                                                                                                                                                                                                                                                                                                                             |                                                                                                                                             |                            |                                |
|-----------------------------------------------------------------------------------------------------------------------------------------------------------------------------------------------------------------------------------------------------------------------------------------------------------------------------------------------------------------------------------------------------------------------------------------------------------------------------------------------------------------------------------------------------------------------------------------------------------------------------------------------------------------------------------------------------------------------------------------------------------------------------------------------------------------------------------------------------------------------------------------------------------------------------------------------------------------------------------------------------------------------------------------------------------------------------|---------------------------------------------------------------------------------------------------------------------------------------------|----------------------------|--------------------------------|
| <p>“I had to ask my relatives and friends who underwent breast cancer treatment about their experiences. Some said they underwent radiotherapy and some didn’t. I was confused about what the exact treatment I was supposed to undergo” (interviewee #1, mastectomy)</p> <p>“I was not explained what my surgical procedure was until I was hospitalized for the surgery” (interviewee #5, cholecystectomy)</p> <p>“More explanation should be given on how to change our lifestyle after the surgery. Only when I was discharged was I told not to ride a bike or climb stairs. I barely make a living by riding my bike to deliver goods. My house is upstairs, and I cannot avoid climbing stairs. So, if the doctors informed me of these things before my surgery, I could have arranged someone to do my work and could stay elsewhere” (interviewee #27, component separation)</p> <p>“When I woke up I noticed four tubes jutting out of me. I was not told that this will happen before the surgery. I felt very scared” (interviewee #2, anterior resection)</p> | <p>Confusion about treatment method</p> <p>No explanation before admission</p> <p>Lack of post-operative lifestyle modification details</p> | <p>Shortage in details</p> | <p>Deficiencies in content</p> |
| <p>“I was not given enough time and information about the operation. So, I consulted a doctor in a private hospital to get more information about my operation” (interviewee #5, cholecystectomy)</p>                                                                                                                                                                                                                                                                                                                                                                                                                                                                                                                                                                                                                                                                                                                                                                                                                                                                       | <p>Lack of time and information</p>                                                                                                         |                            |                                |

|                                                                                                                                                                                                                                                                                                                                                                                                                                        |                                                                                                   |                                         |                                        |
|----------------------------------------------------------------------------------------------------------------------------------------------------------------------------------------------------------------------------------------------------------------------------------------------------------------------------------------------------------------------------------------------------------------------------------------|---------------------------------------------------------------------------------------------------|-----------------------------------------|----------------------------------------|
| <p>“Knowing too many details about my surgery is not good. I’m afraid to hear them because it might make me say no to surgery. Even if the surgery goes wrong, I know the doctors tried their best and I will accept it” (interviewee #10, thyroidectomy)</p> <p>“I know doctors are doing the best for us. Therefore, I do not wish to be educated about the adverse effects of the surgery” (interviewee #15, bariatric surgery)</p> | <p>Do not wish to know adverse effects</p> <p>Scared</p> <p>Believes surgeon will do his best</p> | <p>Failure in individualization</p>     |                                        |
| <p>“I do not like to see educational videos or photos of the surgery. They have a lot of blood and makes me feel nauseated” (interviewee #1, mastectomy)</p> <p>“Give leaflets at the clinic or any books explaining the surgical procedure so that I can go home and read about it” (interviewee #1, mastectomy)</p>                                                                                                                  | <p>Dislike videos/photographs of surgery</p> <p>Books/ leaflets will aid</p>                      | <p>Use of media</p>                     | <p>Methods of information delivery</p> |
| <p>“There is a busy atmosphere in the clinics. The nurses can tell us about the surgery rather than a doctor because they are easier to approach” (interviewee #28, thyroidectomy)</p> <p>“The most junior doctor takes the consent, but we want the senior consultant to explain the procedure to us rather than a junior doctor. Consultants explain better” (interviewee #30, thyroidectomy)</p>                                    | <p>Nurses are easy to approach</p> <p>Consultants explain better</p>                              | <p>Other professional contributions</p> |                                        |
